# Supplementary material
Source: Springer Nature journal article supplement (https://www.springermedizin.de/resource/supplementary/12874_2011_922_MOESM1_ESM.pdf/9433184)
Supplement: MOESM1 [file 9433184]

*pre-treatment ( $t_0$ )*

*post-treatment ( $t_1$ )*

**“indirect change”**

pre-status report

*“How would you describe your health within the past 7 days (excellent/very good/good/fair/poor)?”*

post-status report

*“How would you describe your health within the past 7 days (excellent/very good/good/fair/poor)?”*

*compute difference post – pre ( $\Delta_i$ )*

**“quasi-indirect change”**

post-status report

*“How would you describe your health within the past 7 days (excellent/very good/good/fair/poor)?”*

retrospective pre-status report  
 (“then-test”)

*“How would you describe your health within the 7 days prior to your rehabilitation (excellent/very good/good/fair/poor)?”*

*compute difference post – retrospective pre ( $\Delta_q$ )*

**“direct change”**

compare post status with pre status, report change

*“If you think of your health now and prior to your rehabilitation: how has your health changed due to rehabilitation (markedly better/slightly better/same/slightly worse/markedly worse)?”*

*direct report of perceived change at  $t_1$  ( $\Delta_d$ )*
